# Supplementary figures and images for: Epigenetic Alterations Are Associated With Gastric Emptying Disturbances in Diabetes Mellitus
Source: PubMed Central journal article supplement — Clin Transl Gastroenterol. 2020 Mar 6;11(3):e00136. doi: 10.14309/ctg.0000000000000136 (PMC7145053; doi:10.14309/ctg.0000000000000136), 2020-03-06

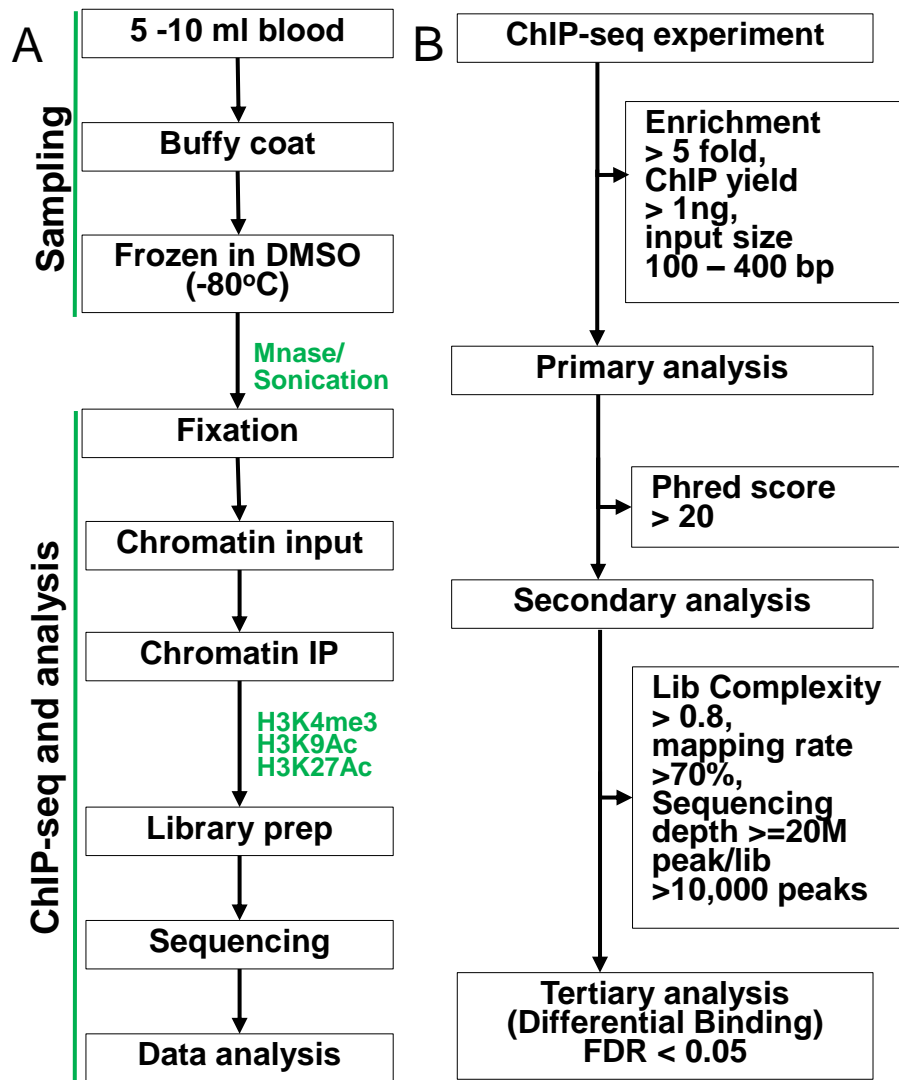

Supplement: ct9-11-e00136-s002.pdf [file ct9-11-e00136-s002.pdf]

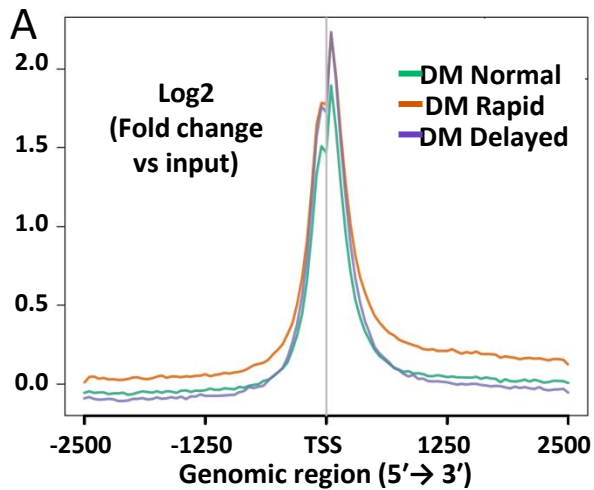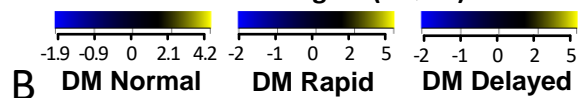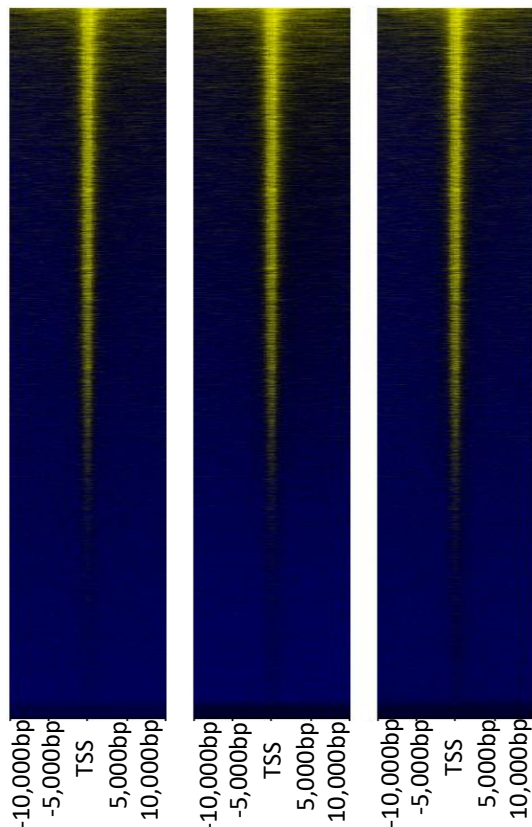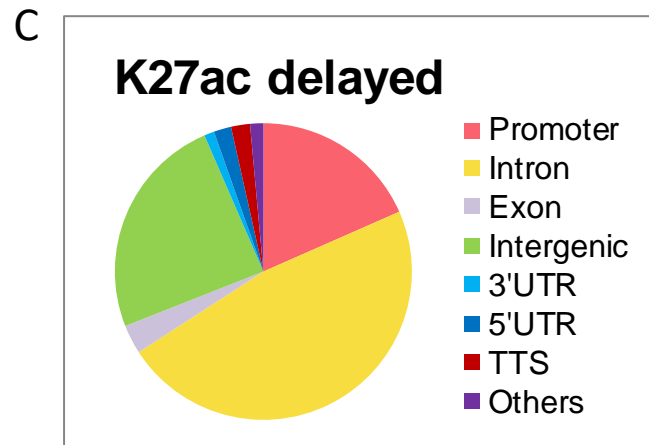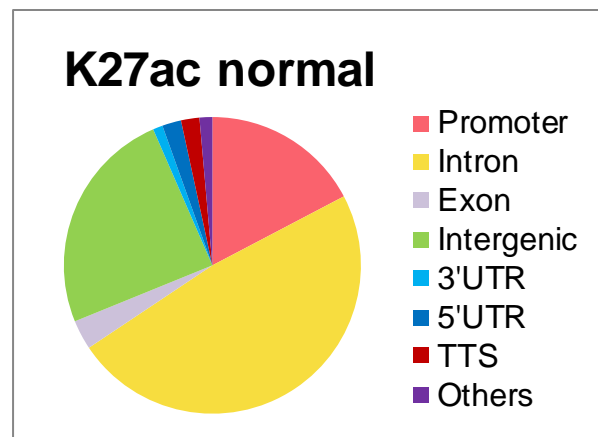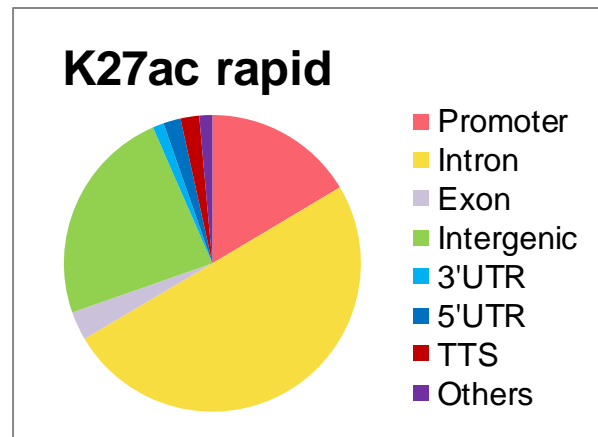

Supplement: ct9-11-e00136-s003.pdf [file ct9-11-e00136-s003.pdf]

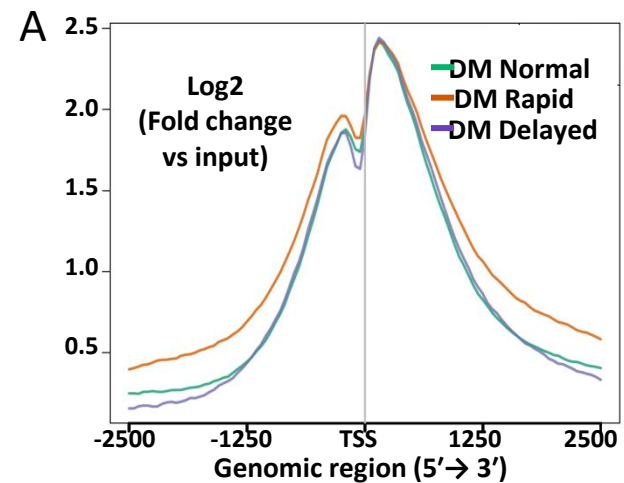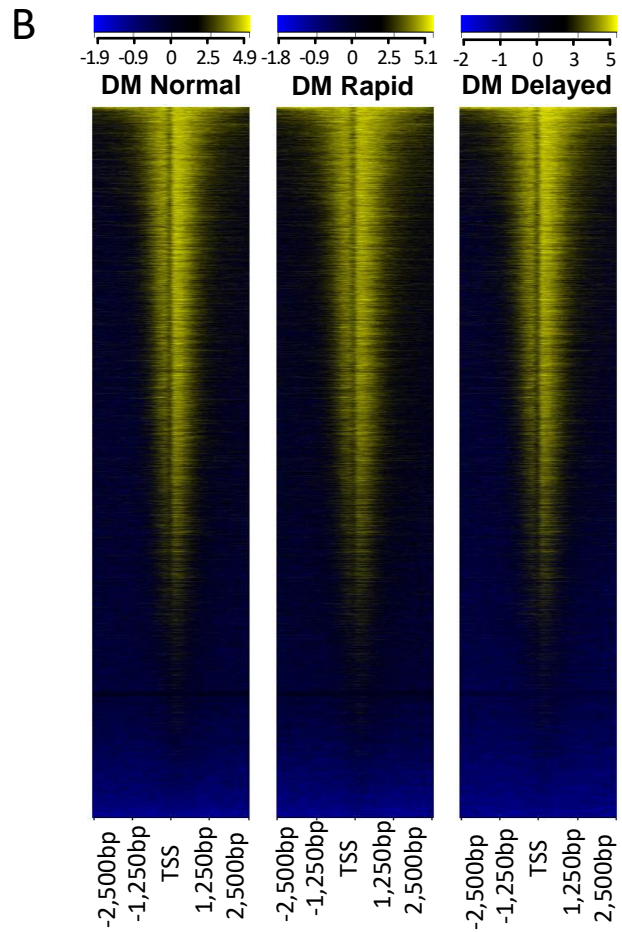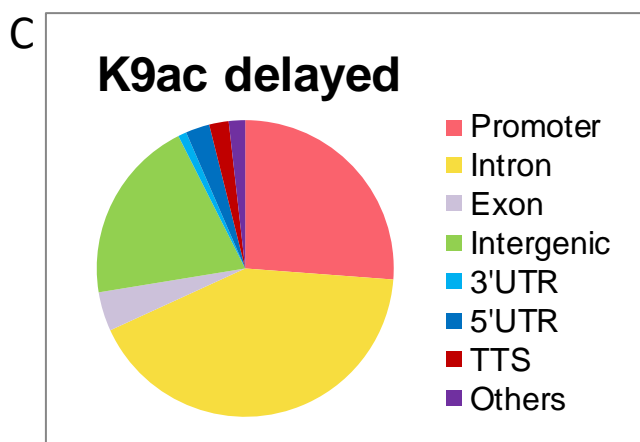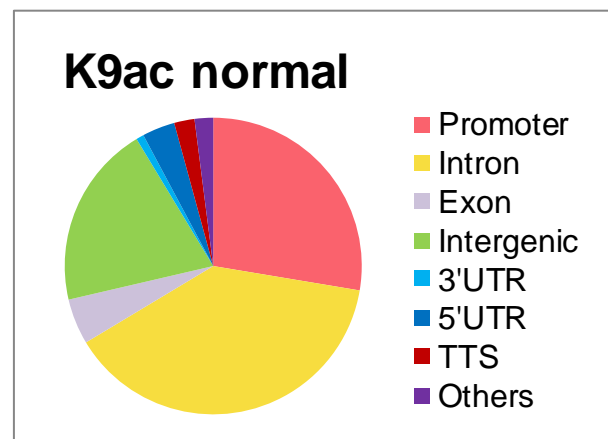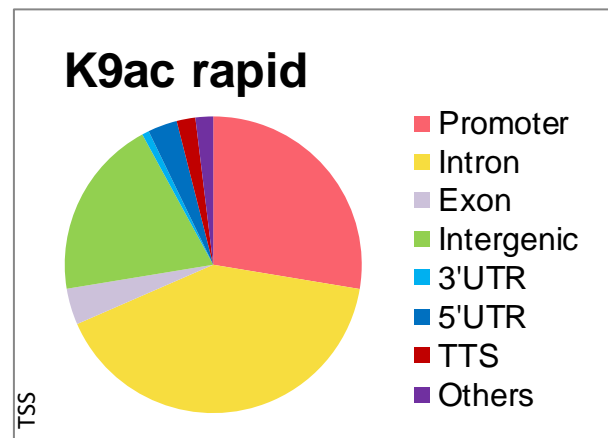

Supplement: ct9-11-e00136-s004.pdf [file ct9-11-e00136-s004.pdf]

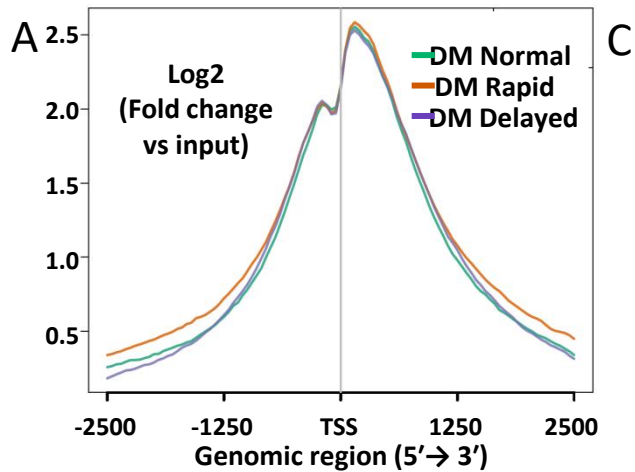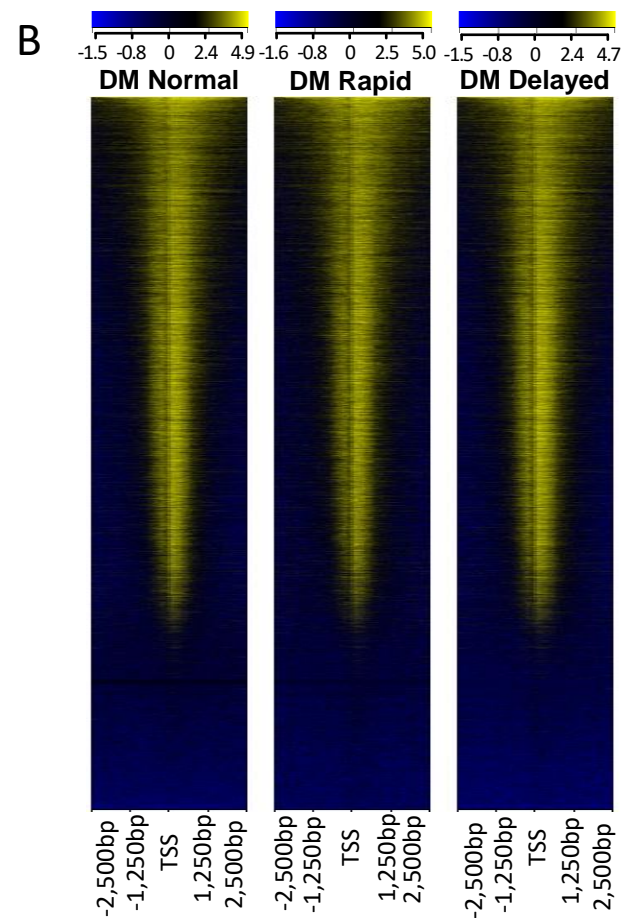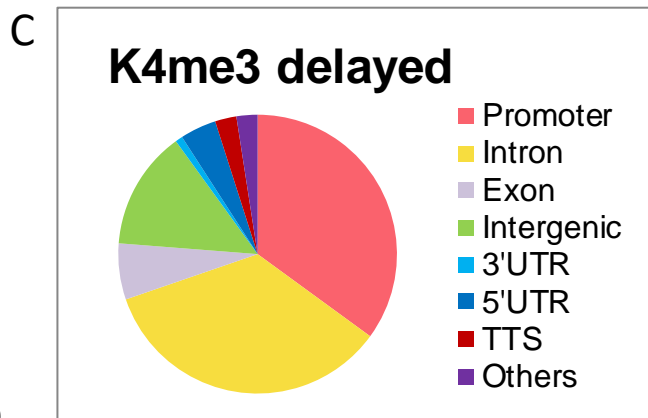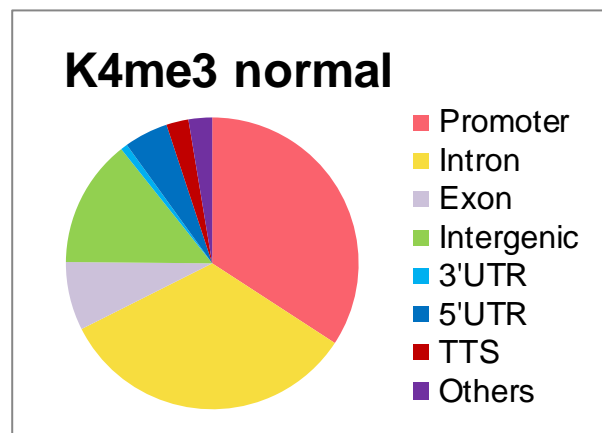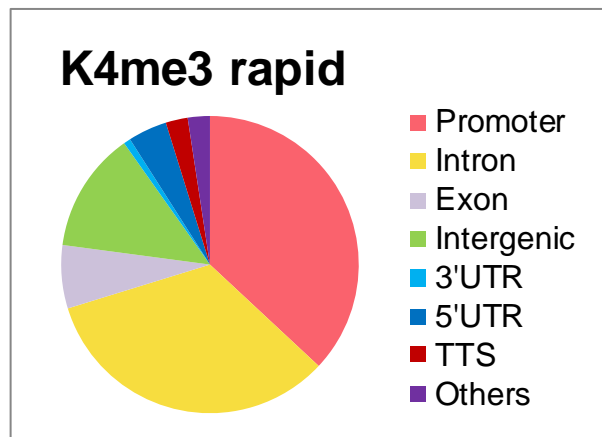

Supplement: ct9-11-e00136-s005.pdf [file ct9-11-e00136-s005.pdf]
